# Supplementary material
Source: HighWire-hosted journal article supplement (https://thorax.bmj.com/content/thoraxjnl-2019-213349)

## ONLINE SUPPLEMENT

**The Association of Body Mass Index, Weight Gain and Central Obesity with Activity-Related Breathlessness: The Swedish CARDioPulmonary bioImage Study**

**Table S1.** Comparison of characteristics between people who were included and excluded in the analysis

**Table S2.** Number of people (%) stratified by measured current body mass index (BMI) and recalled BMI at age 20

**Table S3.** Associations of change in BMI since age 20 with current obesity factors and physical activity

**Table S4.** Associations between obesity factors with breathlessness in women and men separately

**Figure S1.** Directed acyclic graph (DAG) of assumed associations between study variables

**Table S1.** Comparison of characteristics between people who were included and excluded in the analysis

| Characteristic                                  | Included       | Excluded      |
|-------------------------------------------------|----------------|---------------|
| N                                               | 13,437 (85.0%) | 2,373 (15.0%) |
| Age, mean (SD)                                  | 57.5 (4.3)     | 57.8 (4.3)    |
| Women                                           | 7,052 (52.5%)  | 1,133 (47.7%) |
| mMRC breathlessness scale                       |                |               |
| 0                                               | 12,154 (90.5%) | 1,337 (56.3%) |
| 1                                               | 725 (5.4%)     | 133 (5.6%)    |
| 2                                               | 444 (3.3%)     | 115 (4.8%)    |
| 3                                               | 62 (0.5%)      | 35 (1.5%)     |
| 4                                               | 52 (0.4%)      | 59 (2.5%)     |
| Missing                                         | 0 (0.0%)       | 694 (29.2%)   |
| Current BMI, N (%)                              |                |               |
| <20                                             | 336 (2.5%)     | 44 (1.9%)     |
| 20 - <25                                        | 4,675 (34.8%)  | 646 (27.2%)   |
| 25 - <30                                        | 5,697 (42.4%)  | 1021 (43.0%)  |
| ≥ 30                                            | 2,729 (20.3%)  | 660 (27.8%)   |
| Missing                                         | 0 (0.0%)       | 2 (0.1%)      |
| Current BMI, mean (SD)                          | 26.8 (4.3)     | 28.0 (5.0)    |
| BMI at age 20 (self reported), mean (SD)        | 21.9 (2.7)     | 22.2 (3.7)    |
| BMI change since age 20, mean (SD)              | 4.95 (3.89)    | 5.91 (5.47)   |
| BMI change/year since age 20, mean (SD)         | 0.13 (0.11)    | 0.16 (0.15)   |
| Central obesity                                 | 5,595 (41.6%)  | 1,154 (48.8%) |
| Waist circumference (cm), mean (SD)             | 94.0 (12.7)    | 97.1 (13.5)   |
| Waist hip ratio, mean (SD)                      | 0.92 (0.09)    | 0.94 (0.09)   |
| WHR high                                        | 9,483 (70.6%)  | 1,811 (77.3%) |
| FEV <sub>1</sub> (L), mean (SD)                 | 3.26 (0.76)    | 3.10 (0.77)   |
| FEV <sub>1</sub> % of predicted, mean (SD)      | 102.1 (13.9)   | 98.2 (15.3)   |
| FVC (L), mean (SD)                              | 4.19 (0.98)    | 4.00 (0.98)   |
| FVC % of predicted, mean (SD)                   | 102.6 (12.9)   | 98.9 (13.8)   |
| FEV <sub>1</sub> /FVC, mean (SD)                | 0.78 (0.06)    | 0.78 (0.07)   |
| FEV <sub>1</sub> /FVC % of predicted, mean (SD) | 99.2 (8.1)     | 99.0 (9.3)    |
| DL <sub>CO</sub> , mean (SD)                    | 8.54 (1.95)    | 8.25 (1.94)   |

|                                              |               |             |
|----------------------------------------------|---------------|-------------|
| DL <sub>CO</sub> /V <sub>A</sub> , mean (SD) | 1.45 (0.33)   | 1.46 (0.33) |
| Current smoker                               |               |             |
| Yes                                          | 1,784 (13.3%) | 482 (20.3%) |
| Missing                                      | 0 (0.0%)      | 532 (22.4%) |
| Pack years of smoking, mean (SD)             | 12.0 (24.0)   | 19.4 (34.8) |
| Hypertension                                 | 2,917 (21.7%) | 502 (26.3%) |
| Diabetes mellitus                            | 513 (3.8%)    | 153 (8.0%)  |
| Ischemic heart disease                       | 360 (2.7%)    | 92 (4.8%)   |
| Heart failure                                | 165 (1.2%)    | 40 (2.1%)   |
| Atrial fibrillation / flutter                | 244 (1.8%)    | 37 (2.0%)   |
| Heart disease                                | 699 (5.2%)    | 145 (7.6%)  |
| Asthma                                       | 982 (7.3%)    | 200 (10.7%) |
| COPD                                         | 171 (1.3%)    | 51 (2.1%)   |
| OSA                                          | 544 (4.0%)    | 98 (4.1%)   |
| Stroke                                       | 175 (1.3%)    | 38 (1.6%)   |
| Anxiety                                      | 2,780 (20.7%) | 438 (18.5%) |
| Missing                                      | 0             | 709 (29.9%) |
| Depression                                   | 1,998 (14.9%) | 318 (13.4%) |
| Missing                                      | 0             | 799 (33.7%) |
| Level of physical activity                   |               |             |
| Low                                          | 1,578 (11.7%) | 280 (11.8%) |
| Medium                                       | 6,360 (47.3%) | 745 (31.4%) |
| High                                         | 5,499 (40.9%) | 435 (18.3%) |
| Missing                                      | 0             | 913 (38.5%) |

Heart disease was defined as the presence of any of ischemic heart disease, heart failure or atrial fibrillation/flutter. *Abbreviations:* COPD = chronic obstructive pulmonary disease; DL<sub>CO</sub> = diffusion lung capacity for carbon monoxide; FEV<sub>1</sub> = forced expired volume in one second; FVC = forced vital capacity; OSA = obstructive sleep apneas; V<sub>A</sub> = alveolar volume.

**Table S2.** Number of people (%) stratified by measured current body mass index (BMI) and recalled BMI at age 20

| BMI at age 20 | Current BMI |              |              |              | Total        |
|---------------|-------------|--------------|--------------|--------------|--------------|
|               | < 20.0      | 20.0 to <25  | 25.0 to <30  | ≥ 30         |              |
| < 20.0        | 265 (8.2)   | 1,700 (52.7) | 970 (30.1)   | 289 (9.0)    | 3,224 (100)  |
| 20.0 to <25   | 71 (0.8)    | 2,885 (32.5) | 4,245 (47.8) | 1,687 (19.0) | 8,888 (100)  |
| 25.0 to <30   | 0           | 84 (7.0)     | 448 (37.1)   | 675 (55.9)   | 1,207 (100)  |
| ≥ 30          | 0           | 6 (5.1)      | 34 (28.8)    | 78 (66.1)    | 118 (100)    |
| Total         | 336 (2.5)   | 4,675 (34.8) | 5,697 (42.4) | 2,729 (20.3) | 13,437 (100) |

**Table S3.** Associations of change in BMI since age 20 with current obesity factors and physical activity

| <b>Factor (current status)</b> | <b>Mean change in BMI since age 20 (95% CI)</b> | <b>Mean change in BMI since age 20, adjusted for current BMI (95% CI)</b> |
|--------------------------------|-------------------------------------------------|---------------------------------------------------------------------------|
| Waist circumference (per 1 cm) | 0.20 (0.20 – 0.20)                              | 0.08 (0.07 – 0.08)                                                        |
| WHR (per 1 units increase)     | 12.5 (11.8 – 13.2)                              | -1.10 (-1.68 – -0.53)                                                     |
| Central obesity                |                                                 |                                                                           |
| No                             | <i>Ref</i>                                      | <i>Ref</i>                                                                |
| Yes                            | 4.77 (4.66 – 4.87)                              | 1.90 (1.78 – 2.02)                                                        |
| Level of physical exercise     |                                                 |                                                                           |
| Low                            | 3.11 (2.90 – 3.33)                              | 1.15 (1.00 - 1.31)                                                        |
| Medium                         | 1.41 (1.27 – 1.55)                              | 0.62 (0.53 – 0.72)                                                        |
| High                           | <i>Ref</i>                                      | <i>Ref</i>                                                                |

Associations between factors (current status) and change in BMI since age 20, unadjusted and adjusted for current BMI, were analyzed using linear regression.

**Table S4.** Associations between obesity factors with breathlessness in women and men separately

|                                                                   | Odds ratio for having breathlessness (mMRC $\geq$ 1) with 95% confidence intervals |                                              |                                         |                                              |
|-------------------------------------------------------------------|------------------------------------------------------------------------------------|----------------------------------------------|-----------------------------------------|----------------------------------------------|
|                                                                   | MEN                                                                                |                                              | WOMEN                                   |                                              |
| <b>Current BMI</b>                                                | Adjusted for confounders<br>but not FVC                                            | Adjusted for confounders and<br>absolute FVC | Adjusted for confounders<br>but not FVC | Adjusted for confounders and<br>absolute FVC |
| < 20                                                              | 2.12 (1.07-4.20)                                                                   | 1.73 (0.84-3.59)                             | 1.11 (0.57-2.16)                        | 1.10 (0.54-2.22)                             |
| 20 - <25                                                          | 1.00                                                                               | 1.00                                         | 1.00                                    | 1.00                                         |
| 25 - <30                                                          | 1.47 (1.15-1.88)                                                                   | 1.40 (1.09-1.78)                             | 1.56 (1.40-1.74)                        | 1.47 (1.30-1.68)                             |
| $\geq$ 30                                                         | 2.73 (2.27-3.27)                                                                   | 2.34 (1.95-2.81)                             | 4.04 (3.10-5.28)                        | 3.51 (2.65-4.64)                             |
| AUC for model (with all<br>categories)                            | 0.807                                                                              | 0.823                                        | 0.793                                   | 0.802                                        |
| <b>BMI change since age 20</b>                                    |                                                                                    |                                              |                                         |                                              |
| Estimate per 1 unit (kg/m <sup>2</sup> )<br>increase since age 20 | 1.13 (1.11-1.15)                                                                   | 1.11 (1.09-1.13)                             | 1.14 (1.11-1.16)                        | 1.12 (1.10-1.15)                             |
| AUC for model                                                     | 0.816                                                                              | 0.831                                        | 0.794                                   | 0.804                                        |
| <b>BMI change/year since age 20</b>                               |                                                                                    |                                              |                                         |                                              |
| Estimate per 1 SD/year increase in<br>BMI since age 20            | 1.62 (1.52-1.74)                                                                   | 1.52 (1.43-1.61)                             | 1.66 (1.52-1.82)                        | 1.57 (1.44-1.70)                             |
| AUC for model                                                     | 0.816                                                                              | 0.831                                        | 0.794                                   | 0.803                                        |
| <b>Waist circumference (current)</b>                              |                                                                                    |                                              |                                         |                                              |
| Estimate per 1 cm increase                                        | 1.03 (1.03-1.04)                                                                   | 1.03 (1.03-1.04)                             | 1.04 (1.04-1.05)                        | 1.04 (1.04-1.05)                             |

|                                              |                  |                  |                  |                  |
|----------------------------------------------|------------------|------------------|------------------|------------------|
| AUC for model                                | 0.809            | 0.828            | 0.790            | 0.803            |
|                                              |                  |                  |                  |                  |
| <b>Central obesity (current)</b>             |                  |                  |                  |                  |
| Estimate compared to without central obesity | 1.74 (1.40-2.15) | 1.72 (1.39-2.12) | 2.49 (1.87-3.33) | 2.39 (1.83-3.12) |
| AUC for model                                | 0.802            | 0.822            | 0.783            | 0.797            |

*Abbreviations:* AUC = area under the curve; others and confounders are listed in Table 2.

## FIGURES

**Figure S1.** Directed acyclic graph (DAG) of assumed associations between study variables. *Abbreviations:* BMI = body mass index; FVC = forced vital capacity; IHD = ischemic heart disease; mMRC = modified Medical Research Council breathlessness scale; VC = vital capacity.

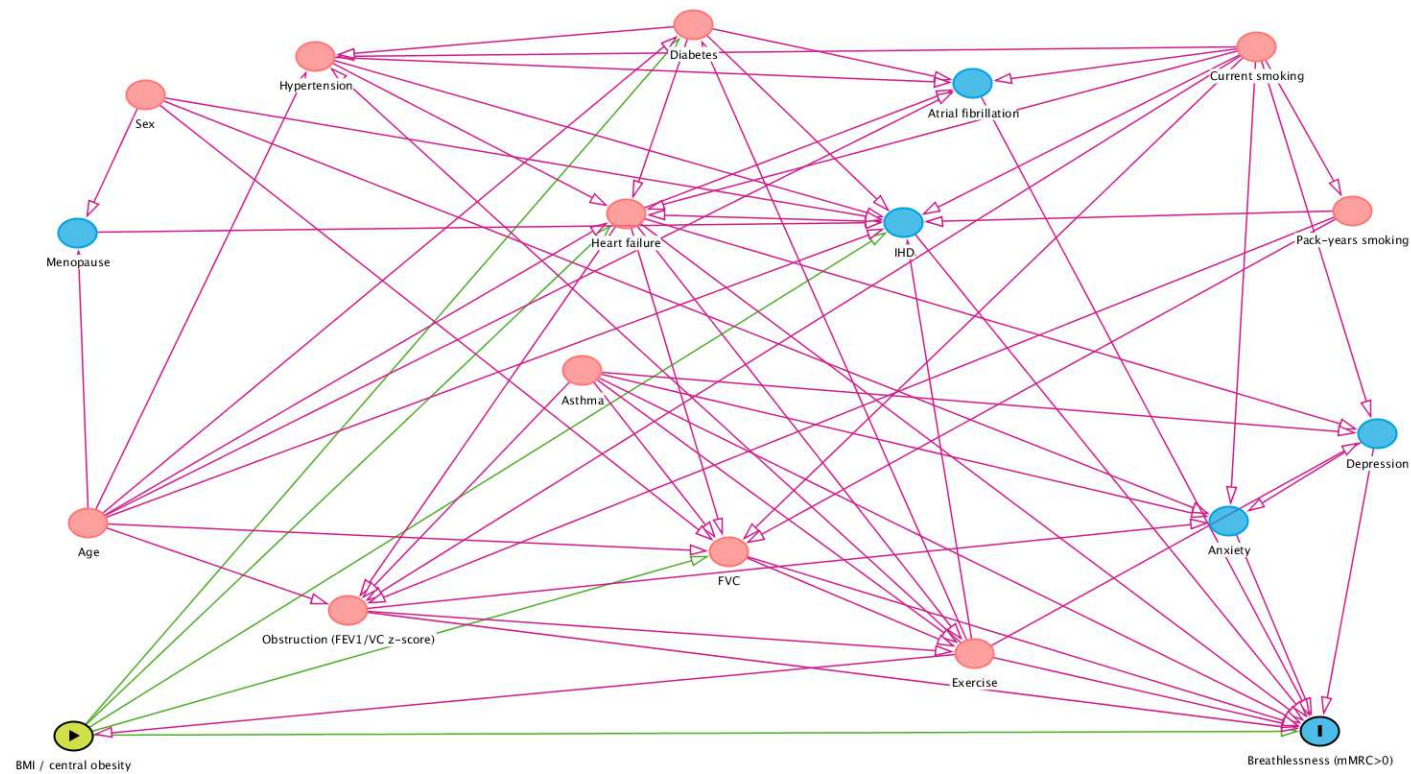

Supplement: inline-supplementary-material-1 [file inline-supplementary-material-1.pdf]
